# Supplementary material for: Dose- and Time-Dependent Effects of Oleate on Mitochondrial Fusion/Fission Proteins and Cell Viability in HepG2 Cells: Comparison with Palmitate Effects
Source: MDPI journal article supplement (doi:10.3390/ijms22189812), 2021-09-10
Supplement: s1 [file s1]

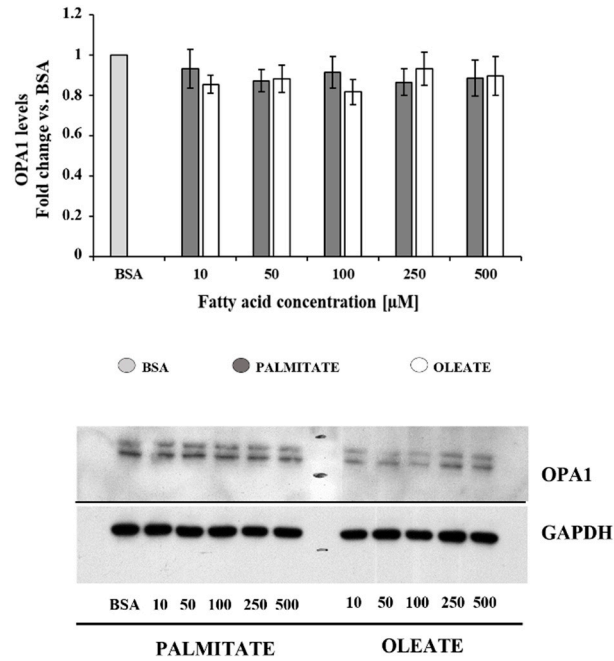

**Figure S1. Dose dependent effect of oleate or palmitate on optic atrophy 1 (OPA1) protein content after 24 hours.** Cells were treated with different doses of oleate or palmitate (0  $\mu$ M, 10  $\mu$ M, 50  $\mu$ M, 100  $\mu$ M, 250  $\mu$ M and 500  $\mu$ M) for 24 hours. A. All data are presented as mean  $\pm$  standard error of the mean (SEM) for 4 biological replicates. Differences were evaluated for statistical significance by two-way ANOVA: concentration effect ns., fatty acids effect ns. and interaction ns. One-way ANOVA analysis showed no significant difference. B. Representative images of OPA1 and loading control for protein normalization glyceraldehyde 3-phosphate dehydrogenase (GAPDH).
